# Supplementary material for: Should I shrink or should I flow? – body size adjustment to thermo-oxygenic niche
Source: bioRxiv or medRxiv preprint supplement (doi:10.1101/2020.01.14.905901), 2020-01-15
Supplement: Supplementary file [file media-1.pdf]

**Table S1.** The list of all the rotifer species analyzed, their species-specific body mass and the bibliographic source of body size information.

| <b>No.</b> | <b>species</b>                    | <b>mean body length<br/>(<math>\mu\text{m}</math>)</b> | <b>bibliographic source</b>                                                                                     |
|------------|-----------------------------------|--------------------------------------------------------|-----------------------------------------------------------------------------------------------------------------|
| 1          | <i>Adineta oculata</i>            | 444                                                    | Segers & Shiel 2005                                                                                             |
| 2          | <i>Adineta vaga</i>               | 455                                                    | Bielańska-Grajner et al. 2013                                                                                   |
| 3          | <i>Anuraeopsis fissa</i>          | 99                                                     | <a href="http://www.nies.go.jp">http://www.nies.go.jp</a> ; Ejsmont-Karabin et al. 2004                         |
| 4          | <i>Ascomorpha agilis</i>          | 145                                                    | Ejsmont-Karabin et al. 2004                                                                                     |
| 5          | <i>Ascomorpha ecaudis</i>         | 165                                                    | Ejsmont-Karabin et al. 2004                                                                                     |
| 6          | <i>Ascomorpha ovalis</i>          | 150                                                    | Kreutz & Foissner 2006; Ejsmont-Karabin et al. 2004                                                             |
| 7          | <i>Ascomorpha saltans</i>         | 122                                                    | Kreutz & Foissner 2006; Ejsmont-Karabin et al. 2004                                                             |
| 8          | <i>Ascomorphella volvocicola</i>  | 130                                                    | Ejsmont-Karabin et al. 2004                                                                                     |
| 9          | <i>Aspelta aper</i>               | 263                                                    | <a href="http://www.nies.go.jp">http://www.nies.go.jp</a> ; Ejsmont-Karabin et al. 2004                         |
| 10         | <i>Aspelta circinator</i>         | 230                                                    | Ejsmont-Karabin et al. 2004                                                                                     |
| 11         | <i>Asplanchna herricki</i>        | 854                                                    | Ejsmont-Karabin et al. 2004                                                                                     |
| 12         | <i>Asplanchna priodonta</i>       | 756                                                    | <a href="http://www.nies.go.jp">http://www.nies.go.jp</a> ; Ejsmont-Karabin et al. 2004                         |
| 13         | <i>Brachionus angularis</i>       | 121                                                    | <a href="http://www.nies.go.jp">http://www.nies.go.jp</a> ; Ejsmont-Karabin et al. 2004                         |
| 14         | <i>Brachionus patulus</i>         | 110                                                    | <a href="http://www.nies.go.jp">http://www.nies.go.jp</a>                                                       |
| 15         | <i>Brachionus quadridentatus</i>  | 234                                                    | <a href="http://www.nies.go.jp">http://www.nies.go.jp</a> ; Ejsmont-Karabin et al. 2004                         |
| 16         | <i>Cephalodella catellina</i>     | 115                                                    | <a href="http://www.nies.go.jp">http://www.nies.go.jp</a> ; Ejsmont-Karabin et al. 2004                         |
| 17         | <i>Cephalodella apocollea</i>     | 143                                                    | <a href="http://www.nies.go.jp">http://www.nies.go.jp</a> ; Ejsmont-Karabin et al. 2004                         |
| 18         | <i>Cephalodella auriculata</i>    | 131                                                    | <a href="http://www.nies.go.jp">http://www.nies.go.jp</a> ; Kreutz & Foissner 2006; Ejsmont-Karabin et al. 2004 |
| 19         | <i>Cephalodella compressa</i>     | 142                                                    | <a href="http://www.nies.go.jp">http://www.nies.go.jp</a>                                                       |
| 20         | <i>Cephalodella elongata</i>      | 110                                                    | <a href="http://www.nies.go.jp">http://www.nies.go.jp</a>                                                       |
| 21         | <i>Cephalodella eva</i>           | 122                                                    | <a href="http://www.nies.go.jp">http://www.nies.go.jp</a> ; Ejsmont-Karabin et al. 2004                         |
| 22         | <i>Cephalodella exigua</i>        | 89                                                     | <a href="http://www.nies.go.jp">http://www.nies.go.jp</a> ; Ejsmont-Karabin et al. 2004                         |
| 23         | <i>Cephalodella forficula</i>     | 198                                                    | <a href="http://www.nies.go.jp">http://www.nies.go.jp</a> ; Ejsmont-Karabin et al. 2004                         |
| 24         | <i>Cephalodella gibba</i>         | 217                                                    | <a href="http://www.nies.go.jp">http://www.nies.go.jp</a> ; Kreutz&Foissner                                     |
| 25         | <i>Cephalodella gracilis</i>      | 107                                                    | <a href="http://www.nies.go.jp">http://www.nies.go.jp</a> ; Ejsmont-Karabin et al. 2004                         |
| 26         | <i>Cephalodella gobio</i>         | 111                                                    | <a href="http://www.nies.go.jp">http://www.nies.go.jp</a> ; Ejsmont-Karabin et al. 2004                         |
| 27         | <i>Cephalodella intuta</i>        | 86                                                     | <a href="http://www.nies.go.jp">http://www.nies.go.jp</a>                                                       |
| 28         | <i>Cephalodella limosa</i>        | 111                                                    | Ejsmont-Karabin et al. 2004                                                                                     |
| 29         | <i>Cephalodella megalocephala</i> | 173                                                    | <a href="http://www.nies.go.jp">http://www.nies.go.jp</a> ; Ejsmont-Karabin et al. 2004                         |
| 30         | <i>Cephalodella mucronata</i>     | 150                                                    | <a href="http://www.nies.go.jp">http://www.nies.go.jp</a>                                                       |
| 31         | <i>Cephalodella nana</i>          | 80                                                     | <a href="http://www.nies.go.jp">http://www.nies.go.jp</a> ; Ejsmont-Karabin et al. 2004                         |
| 32         | <i>Cephalodella sterea</i>        | 148                                                    | <a href="http://www.nies.go.jp">http://www.nies.go.jp</a> ; Ejsmont-Karabin et al. 2004                         |
| 33         | <i>Cephalodella ventripes</i>     | 111                                                    | <a href="http://www.nies.go.jp">http://www.nies.go.jp</a> ; Ejsmont-Karabin et al. 2004                         |
| 34         | <i>Collotheca libera</i>          | 97                                                     | Ejsmont-Karabin et al. 2004                                                                                     |
| 35         | <i>Collotheca mutabilis</i>       | 182                                                    | <a href="http://www.nies.go.jp">http://www.nies.go.jp</a>                                                       |
| 36         | <i>Collotheca ornata</i>          | 139                                                    | <a href="http://www.nies.go.jp">http://www.nies.go.jp</a> ; Kreutz & Foissner 2006                              |
| 37         | <i>Collotheca pelagica</i>        | 159                                                    | <a href="http://www.nies.go.jp">http://www.nies.go.jp</a> ; Ejsmont-Karabin et al. 2004                         |
| 38         | <i>Colurella adriatica</i>        | 90                                                     | <a href="http://www.nies.go.jp">http://www.nies.go.jp</a> ; Ejsmont-Karabin et al. 2004                         |
| 39         | <i>Colurella anodonta</i>         | 60                                                     | <a href="http://www.nies.go.jp">http://www.nies.go.jp</a>                                                       |
| 40         | <i>Colurella colurus</i>          | 83                                                     | <a href="http://www.nies.go.jp">http://www.nies.go.jp</a> ; Ejsmont-Karabin et al. 2004                         |
| 41         | <i>Colurella obtusa</i>           | 73                                                     | Kreutz & Foissner 2006; Ejsmont-Karabin et al. 2004                                                             |
| 42         | <i>Colurella tessellata</i>       | 58                                                     | Ejsmont-Karabin et al. 2004                                                                                     |
| 43         | <i>Colurella uncinata</i>         | 81                                                     | <a href="http://www.nies.go.jp">http://www.nies.go.jp</a> ; Ejsmont-Karabin et al. 2004                         |
| 44         | <i>Conochilus dossuarius</i>      | 310                                                    | <a href="http://www.nies.go.jp">http://www.nies.go.jp</a> ; Ejsmont-Karabin et al. 2004                         |

|    |                                     |     |                                                                                         |
|----|-------------------------------------|-----|-----------------------------------------------------------------------------------------|
| 45 | <i>Conochilus coenobasis</i>        | 275 | <a href="http://www.nies.go.jp">http://www.nies.go.jp</a>                               |
| 46 | <i>Conochilus hippocrepis</i>       | 565 | <a href="http://www.nies.go.jp">http://www.nies.go.jp</a>                               |
| 47 | <i>Conochilus unicornis</i>         | 285 | <a href="http://www.nies.go.jp">http://www.nies.go.jp</a>                               |
| 48 | <i>Dissotrocha macrostyla</i>       | 442 | Kreutz & Foissner 2006; Bielańska-Grajner et al. 2013                                   |
| 49 | <i>Encentrum eurycephalum</i>       | 390 | Ejsmont-Karabin et al. 2004                                                             |
| 50 | <i>Encentrum flexile</i>            | 194 | <a href="http://www.nies.go.jp">http://www.nies.go.jp</a>                               |
| 51 | <i>Encentrum lupus</i>              | 175 | Ejsmont-Karabin et al. 2004                                                             |
| 52 | <i>Eothinia elongata</i>            | 388 | Ejsmont-Karabin et al. 2004                                                             |
| 53 | <i>Eothinia triphaea</i>            | 182 | <a href="http://www.nies.go.jp">http://www.nies.go.jp</a>                               |
| 54 | <i>Epiphanes senta</i>              | 458 | <a href="http://www.nies.go.jp">http://www.nies.go.jp</a> ; Ejsmont-Karabin et al. 2004 |
| 55 | <i>Euchlanis alata</i>              | 262 | Ejsmont-Karabin et al. 2004                                                             |
| 56 | <i>Euchlanis dilatata</i>           | 228 | Ejsmont-Karabin et al. 2004                                                             |
| 57 | <i>Euchlanis deflexa</i>            | 290 | <a href="http://www.nies.go.jp">http://www.nies.go.jp</a>                               |
| 58 | <i>Euchlanis lucksiana</i>          | 186 | <a href="http://www.nies.go.jp">http://www.nies.go.jp</a>                               |
| 59 | <i>Euchlanis incisa</i>             | 224 | Ejsmont-Karabin et al. 2004                                                             |
| 60 | <i>Euchlanis meneta</i>             | 137 | Ejsmont-Karabin et al. 2004                                                             |
| 61 | <i>Euchlanis oropha</i>             | 169 | Ejsmont-Karabin et al. 2004                                                             |
| 62 | <i>Euchlanis triquetra</i>          | 431 | Ejsmont-Karabin et al. 2004                                                             |
| 63 | <i>Filinia longiseta</i>            | 168 | Ejsmont-Karabin et al. 2004                                                             |
| 64 | <i>Filinia terminalis</i>           | 168 | Ejsmont-Karabin et al. 2004                                                             |
| 65 | <i>Floscularia janus</i>            | 215 | Ejsmont-Karabin et al. 2004                                                             |
| 66 | <i>Gastropus hytopus</i>            | 229 | <a href="http://www.nies.go.jp">http://www.nies.go.jp</a> ; Ejsmont-Karabin et al. 2004 |
| 67 | <i>Gastropus stylifer</i>           | 172 | Ejsmont-Karabin et al. 2004                                                             |
| 68 | <i>Habrotrocha bidens</i>           | 411 | <a href="http://www.nies.go.jp">http://www.nies.go.jp</a>                               |
| 69 | <i>Habrotrocha collaris</i>         | 292 | <a href="http://www.nies.go.jp">http://www.nies.go.jp</a>                               |
| 70 | <i>Habrotrocha constricta</i>       | 287 | <a href="http://www.nies.go.jp">http://www.nies.go.jp</a>                               |
| 71 | <i>Habrotrocha lata</i>             | 196 | <a href="http://www.nies.go.jp">http://www.nies.go.jp</a>                               |
| 72 | <i>Hexarthra mira</i>               | 286 | <a href="http://www.nies.go.jp">http://www.nies.go.jp</a> ; Ejsmont-Karabin et al. 2004 |
| 73 | <i>Kellicottia longispina</i>       | 687 | <a href="http://www.nies.go.jp">http://www.nies.go.jp</a> ; Ejsmont-Karabin et al. 2004 |
| 74 | <i>Keratella cochlearis robusta</i> | 210 | <a href="http://www.nies.go.jp">http://www.nies.go.jp</a>                               |
| 75 | <i>Keratella cochlearis tecta</i>   | 100 | <a href="http://www.nies.go.jp">http://www.nies.go.jp</a>                               |
| 76 | <i>Keratella hiemalis</i>           | 200 | Ejsmont-Karabin et al. 2004                                                             |
| 77 | <i>Keratella quadrata</i>           | 229 | Ejsmont-Karabin et al. 2004                                                             |
| 78 | <i>Keratella serrulata</i>          | 181 | Ejsmont-Karabin et al. 2004                                                             |
| 79 | <i>Keratella ticinensis</i>         | 132 | Ejsmont-Karabin et al. 2004                                                             |
| 80 | <i>Keratella valga</i>              | 194 | Ejsmont-Karabin et al. 2004                                                             |
| 81 | <i>Lecane depressa</i>              | 121 | <a href="http://www.nies.go.jp">http://www.nies.go.jp</a> ; Ejsmont-Karabin et al. 2004 |
| 82 | <i>Lecane bulla</i>                 | 142 | Kreutz & Foissner 2006; Ejsmont-Karabin et al. 2004                                     |
| 83 | <i>Lecane clara</i>                 | 99  | Segers 1995; Ejsmont-Karabin et al. 2004                                                |
| 84 | <i>Lecane closterocerca</i>         | 71  | Ejsmont-Karabin et al. 2004                                                             |
| 85 | <i>Lecane flexilis</i>              | 73  | Ejsmont-Karabin et al. 2004                                                             |
| 86 | <i>Lecane furcata</i>               | 64  | <a href="http://www.nies.go.jp">http://www.nies.go.jp</a>                               |
| 87 | <i>Lecane hamata</i>                | 80  | <a href="http://www.nies.go.jp">http://www.nies.go.jp</a> ; Ejsmont-Karabin et al. 2004 |
| 88 | <i>Lecane inermis</i>               | 91  | Kreutz & Foissner 2006; Segers 1995; Ejsmont-Karabin et al. 2004                        |
| 89 | <i>Lecane luna</i>                  | 131 | <a href="http://www.nies.go.jp">http://www.nies.go.jp</a> ; Ejsmont-Karabin et al. 2004 |
| 90 | <i>Lecane lunaris</i>               | 110 | <a href="http://www.nies.go.jp">http://www.nies.go.jp</a> ; Ejsmont-Karabin et al. 2004 |
| 91 | <i>Lecane crenata</i>               | 110 | <a href="http://www.nies.go.jp">http://www.nies.go.jp</a>                               |
| 92 | <i>Lecane mira</i>                  | 143 | <a href="http://www.nies.go.jp">http://www.nies.go.jp</a> ; Ejsmont-Karabin et al. 2004 |

|     |                                 |     |                                                                                         |
|-----|---------------------------------|-----|-----------------------------------------------------------------------------------------|
| 93  | <i>Lecane scutata</i>           | 72  | Ejsmont-Karabin et al. 2004                                                             |
| 94  | <i>Lecane stichaea</i>          | 90  | Ejsmont-Karabin et al. 2004                                                             |
| 95  | <i>Lecane tenuiseta</i>         | 69  | Ejsmont-Karabin et al. 2004                                                             |
| 96  | <i>Lecane unguolata</i>         | 216 | <a href="http://www.nies.go.jp">http://www.nies.go.jp</a> ; Ejsmont-Karabin et al. 2004 |
| 97  | <i>Lepadella acuminata</i>      | 551 | Ejsmont-Karabin et al. 2004                                                             |
| 98  | <i>Lepadella biloba</i>         | 93  | <a href="http://www.nies.go.jp">http://www.nies.go.jp</a>                               |
| 99  | <i>Lepadella ovalis</i>         | 135 | Ejsmont-Karabin et al. 2004                                                             |
| 100 | <i>Lepadella patella</i>        | 86  | <a href="http://www.nies.go.jp">http://www.nies.go.jp</a> ; Ejsmont-Karabin et al. 2004 |
| 101 | <i>Lepadella triptera</i>       | 72  | <a href="http://www.nies.go.jp">http://www.nies.go.jp</a> ; Ejsmont-Karabin et al. 2004 |
| 102 | <i>Lepadella triba</i>          | 77  | <a href="http://www.nies.go.jp">http://www.nies.go.jp</a> ; Ejsmont-Karabin et al. 2004 |
| 103 | <i>Lindia torulosa</i>          | 315 | Ejsmont-Karabin et al. 2004                                                             |
| 104 | <i>Macrotrachela angusta</i>    | 275 | <a href="http://www.nies.go.jp">http://www.nies.go.jp</a>                               |
| 105 | <i>Macrotrachela ehrenbergi</i> | 312 | <a href="http://www.nies.go.jp">http://www.nies.go.jp</a>                               |
| 106 | <i>Mikrocodides chlaena</i>     | 169 | <a href="http://www.nies.go.jp">http://www.nies.go.jp</a>                               |
| 107 | <i>Microcodon clavus</i>        | 192 | Ejsmont-Karabin et al. 2004                                                             |
| 108 | <i>Monommata aeschyna</i>       | 150 | <a href="http://www.nies.go.jp">http://www.nies.go.jp</a>                               |
| 109 | <i>Monommata grandis</i>        | 133 | <a href="http://www.nies.go.jp">http://www.nies.go.jp</a> ; Ejsmont-Karabin et al. 2004 |
| 110 | <i>Monommata longiseta</i>      | 96  | <a href="http://www.nies.go.jp">http://www.nies.go.jp</a> ; Ejsmont-Karabin et al. 2004 |
| 111 | <i>Monommata phoxa</i>          | 150 | <a href="http://www.nies.go.jp">http://www.nies.go.jp</a> ; Ejsmont-Karabin et al. 2004 |
| 112 | <i>Mytilina mucronata</i>       | 191 | <a href="http://www.nies.go.jp">http://www.nies.go.jp</a> ; Ejsmont-Karabin et al. 2004 |
| 113 | <i>Notholca acuminata</i>       | 253 | Ejsmont-Karabin et al. 2004                                                             |
| 114 | <i>Notholca caudata</i>         | 373 | Ejsmont-Karabin et al. 2004                                                             |
| 115 | <i>Notholca squamula</i>        | 155 | Ejsmont-Karabin et al. 2004                                                             |
| 116 | <i>Notommata contorta</i>       | 333 | Ejsmont-Karabin et al. 2004                                                             |
| 117 | <i>Notommata cyrtopus</i>       | 236 | Ejsmont-Karabin et al. 2004                                                             |
| 118 | <i>Notommata tripus</i>         | 175 | Ejsmont-Karabin et al. 2004                                                             |
| 119 | <i>Philodina citrina</i>        | 378 | <a href="http://www.nies.go.jp">http://www.nies.go.jp</a>                               |
| 120 | <i>Philodina megalotrocha</i>   | 203 | <a href="http://www.nies.go.jp">http://www.nies.go.jp</a>                               |
| 121 | <i>Philodina roseola</i>        | 421 | <a href="http://www.nies.go.jp">http://www.nies.go.jp</a>                               |
| 122 | <i>Platyias quadricornis</i>    | 260 | Ejsmont-Karabin et al. 2004                                                             |
| 123 | <i>Pleurotrocha petromyzon</i>  | 270 | <a href="http://www.nies.go.jp">http://www.nies.go.jp</a> ; Ejsmont-Karabin et al. 2004 |
| 124 | <i>Ploesoma hudsoni</i>         | 400 | Ejsmont-Karabin et al. 2004                                                             |
| 125 | <i>Ploesoma triacanthum</i>     | 177 | Ejsmont-Karabin et al. 2004                                                             |
| 126 | <i>Ploesoma truncatum</i>       | 178 | Ejsmont-Karabin et al. 2004                                                             |
| 127 | <i>Polyarthra dolichoptera</i>  | 125 | Ejsmont-Karabin et al. 2004                                                             |
| 128 | <i>Polyarthra euryptera</i>     | 203 | Ejsmont-Karabin et al. 2004                                                             |
| 129 | <i>Polyarthra longiremis</i>    | 170 | Ejsmont-Karabin et al. 2004                                                             |
| 130 | <i>Polyarthra major</i>         | 168 | Ejsmont-Karabin et al. 2004                                                             |
| 131 | <i>Polyarthra minor</i>         | 79  | Ejsmont-Karabin et al. 2004                                                             |
| 132 | <i>Polyarthra remata</i>        | 96  | Ejsmont-Karabin et al. 2004                                                             |
| 133 | <i>Polyarthra vulgaris</i>      | 141 | Ejsmont-Karabin et al. 2004                                                             |
| 134 | <i>Pompholyx sulcata</i>        | 111 | Ejsmont-Karabin et al. 2004                                                             |
| 135 | <i>Proales decipiens</i>        | 200 | Ejsmont-Karabin et al. 2004                                                             |
| 136 | <i>Proales fallaciosa</i>       | 260 | Ejsmont-Karabin et al. 2004                                                             |
| 137 | <i>Proales minima</i>           | 65  | Ejsmont-Karabin et al. 2004                                                             |
| 138 | <i>Proalinopsis caudatus</i>    | 213 | <a href="http://www.nies.go.jp">http://www.nies.go.jp</a> ; Ejsmont-Karabin et al. 2004 |
| 139 | <i>Ptygura crystallina</i>      | 453 | Ejsmont-Karabin et al. 2004                                                             |
| 140 | <i>Rotaria citrina</i>          | 850 | <a href="http://www.nies.go.jp">http://www.nies.go.jp</a>                               |

|     |                                |      |                                                                                         |
|-----|--------------------------------|------|-----------------------------------------------------------------------------------------|
| 141 | <i>Rotaria elongata</i>        | 1500 | <a href="http://www.nies.go.jp">http://www.nies.go.jp</a>                               |
| 142 | <i>Rotaria macroceros</i>      | 256  | <a href="http://www.nies.go.jp">http://www.nies.go.jp</a>                               |
| 143 | <i>Rotaria macrura</i>         | 700  | <a href="http://www.nies.go.jp">http://www.nies.go.jp</a>                               |
| 144 | <i>Rotaria neptunia</i>        | 573  | <a href="http://www.nies.go.jp">http://www.nies.go.jp</a>                               |
| 145 | <i>Rotaria rotatoria</i>       | 655  | <a href="http://www.nies.go.jp">http://www.nies.go.jp</a>                               |
| 146 | <i>Rotaria tardigrada</i>      | 531  | <a href="http://www.nies.go.jp">http://www.nies.go.jp</a>                               |
| 147 | <i>Rotaria trisecata</i>       | 1150 | <a href="http://www.nies.go.jp">http://www.nies.go.jp</a>                               |
| 148 | <i>Sinantherina socialis</i>   | 1360 | Ejsmont-Karabin et al. 2004                                                             |
| 149 | <i>Squatinella rostrum</i>     | 184  | Ejsmont-Karabin et al. 2004                                                             |
| 150 | <i>Synchaeta lakowitziana</i>  | 285  | <a href="http://www.nies.go.jp">http://www.nies.go.jp</a> ; Ejsmont-Karabin et al. 2004 |
| 151 | <i>Synchaeta longipes</i>      | 184  | Ejsmont-Karabin et al. 2004                                                             |
| 152 | <i>Synchaeta oblonga</i>       | 223  | Ejsmont-Karabin et al. 2004                                                             |
| 153 | <i>Synchaeta pectinata</i>     | 395  | Ejsmont-Karabin et al. 2004                                                             |
| 154 | <i>Synchaeta stylata</i>       | 221  | Ejsmont-Karabin et al. 2004                                                             |
| 155 | <i>Synchaeta tremula</i>       | 226  | Ejsmont-Karabin et al. 2004                                                             |
| 156 | <i>Synchaeta kitina</i>        | 132  | <a href="http://www.nies.go.jp">http://www.nies.go.jp</a>                               |
| 157 | <i>Synchaeta grandis</i>       | 500  | Ejsmont-Karabin et al. 2004                                                             |
| 158 | <i>Taphrocampa annulosa</i>    | 171  | Ejsmont-Karabin et al. 2004                                                             |
| 159 | <i>Taphrocampa selenura</i>    | 211  | Ejsmont-Karabin et al. 2004                                                             |
| 160 | <i>Testudinella emarginula</i> | 114  | <a href="http://www.nies.go.jp">http://www.nies.go.jp</a>                               |
| 161 | <i>Testudinella parva</i>      | 105  | <a href="http://www.nies.go.jp">http://www.nies.go.jp</a> ; Ejsmont-Karabin et al. 2004 |
| 162 | <i>Testudinella patina</i>     | 177  | <a href="http://www.nies.go.jp">http://www.nies.go.jp</a> ; Ejsmont-Karabin et al. 2004 |
| 163 | <i>Trichocerca bicristata</i>  | 256  | Ejsmont-Karabin et al. 2004                                                             |
| 164 | <i>Trichocerca bidens</i>      | 148  | Ejsmont-Karabin et al. 2004                                                             |
| 165 | <i>Trichocerca birostris</i>   | 173  | <a href="http://www.nies.go.jp">http://www.nies.go.jp</a>                               |
| 166 | <i>Trichocerca brachyura</i>   | 91   | Ejsmont-Karabin et al. 2004                                                             |
| 167 | <i>Trichocerca capucina</i>    | 268  | Ejsmont-Karabin et al. 2004                                                             |
| 168 | <i>Trichocerca cavia</i>       | 113  | Ejsmont-Karabin et al. 2004                                                             |
| 169 | <i>Trichocerca elongata</i>    | 302  | Ejsmont-Karabin et al. 2004                                                             |
| 170 | <i>Trichocerca iernis</i>      | 174  | Ejsmont-Karabin et al. 2004                                                             |
| 171 | <i>Trichocerca intermedia</i>  | 100  | <a href="http://www.nies.go.jp">http://www.nies.go.jp</a>                               |
| 172 | <i>Trichocerca longiseta</i>   | 261  | Ejsmont-Karabin et al. 2004                                                             |
| 173 | <i>Trichocerca minuta</i>      | 98   | <a href="http://www.nies.go.jp">http://www.nies.go.jp</a>                               |
| 174 | <i>Trichocerca porcellus</i>   | 153  | Ejsmont-Karabin et al. 2004                                                             |
| 175 | <i>Trichocerca pusilla</i>     | 76   | Ejsmont-Karabin et al. 2004                                                             |
| 176 | <i>Trichocerca rattus</i>      | 172  | Ejsmont-Karabin et al. 2004                                                             |
| 177 | <i>Trichocerca marina</i>      | 166  | <a href="http://www.nies.go.jp">http://www.nies.go.jp</a>                               |
| 178 | <i>Trichocerca rotundata</i>   | 112  | <a href="http://www.nies.go.jp">http://www.nies.go.jp</a>                               |
| 179 | <i>Trichocerca rousseleti</i>  | 88   | Ejsmont-Karabin et al. 2004                                                             |
| 180 | <i>Trichocerca scipio</i>      | 165  | Ejsmont-Karabin et al. 2004                                                             |
| 181 | <i>Trichocerca similis</i>     | 155  | Ejsmont-Karabin et al. 2004                                                             |
| 182 | <i>Trichocerca sulcata</i>     | 110  | Ejsmont-Karabin et al. 2004                                                             |
| 183 | <i>Trichocerca tenuior</i>     | 153  | Ejsmont-Karabin et al. 2004                                                             |
| 184 | <i>Trichocerca tigris</i>      | 170  | Ejsmont-Karabin et al. 2004                                                             |
| 185 | <i>Trichocerca uncinata</i>    | 83   | Ejsmont-Karabin et al. 2004                                                             |
| 186 | <i>Trichocerca weberi</i>      | 112  | Ejsmont-Karabin et al. 2004                                                             |
| 187 | <i>Trichotria pocillum</i>     | 127  | <a href="http://www.nies.go.jp">http://www.nies.go.jp</a>                               |
| 188 | <i>Trichotria tetractis</i>    | 131  | <a href="http://www.nies.go.jp">http://www.nies.go.jp</a>                               |
